# Supplementary material for: Complex relationships between soybean trade destination and tropical deforestation
Source: PubMed Central journal article supplement (PMC10338464; doi:10.1038/s41598-023-38405-1), 2023-07-12
Supplement: 41598_2023_38405_MOESM1_ESM.pdf [file 41598_2023_38405_MOESM1_ESM.pdf]

## *Supplementary Material*

### **Complex Relationships Between Soybean Trade Destination and Tropical Deforestation**

#### **1 Supplementary Tables**

**Supplementary Table 1. Change Matrix for 2004-2011—Mato Grosso.** Units are hectares.

|                     | Natural forest   | Pasture         | Soybean        | Other crops    | Forest plantation | Urban area   | Non-vegetated areas | Water         | <b>TOTAL 2004</b> |
|---------------------|------------------|-----------------|----------------|----------------|-------------------|--------------|---------------------|---------------|-------------------|
| Natural forest      | 37095571         | 2743853         | 281553         | 332642         | 6502              | 2328         | 15790               | 111775        | <b>40590018</b>   |
| Pasture             | 1161319          | 17031314        | 843678         | 1029837        | 35898             | 5248         | 11197               | 3515          | <b>20122008</b>   |
| Soybean             | 12804            | 81087           | 4273301        | 603746         | 5151              | 958          | 1542                | 372           | <b>4978965</b>    |
| Other crops         | 113398           | 482517          | 1115427        | 1374340        | 5994              | 1241         | 4879                | 657           | <b>3098458</b>    |
| Forest plantation   | 938              | 679             | 741            | 343            | 23157             | 0.26         | 1                   | 7             | <b>25869</b>      |
| Urban area          | 38               | 44              | 12             | 41             | 0.35              | 84110        | 18                  | 8             | <b>84275</b>      |
| Non-vegetated areas | 11144            | 15737           | 11186          | 15433          | 181               | 1318         | 10043364            | 829           | <b>156264</b>     |
| Water               | 82904            | 1933            | 22             | 449            | 4                 | 21           | 1971                | 437673        | <b>524980</b>     |
| <b>TOTAL 2011</b>   | <b>384781193</b> | <b>20357169</b> | <b>6525923</b> | <b>3356833</b> | <b>76890</b>      | <b>95229</b> | <b>135835</b>       | <b>554839</b> |                   |

Supplementary Material

**Supplementary Table 2. Change Matrix for 2011-2017—Mato Grosso.** Units are hectares.

|                     | Natural forest  | Pasture         | Soybean        | Other crops    | Forest plantation | Urban area    | Non-vegetated areas | Water         | <b>TOTAL 2011</b> |
|---------------------|-----------------|-----------------|----------------|----------------|-------------------|---------------|---------------------|---------------|-------------------|
| Natural forest      | 36065026        | 1845953         | 211921         | 251587         | 15375             | 1852          | 19589               | 66826         | <b>38478129</b>   |
| Pasture             | 1165301         | 16299299        | 1599995        | 1236821        | 31728             | 5313          | 14643               | 4066          | <b>20357166</b>   |
| Soybean             | 7972            | 47738           | 6206520        | 256436         | 5011              | 1302          | 860                 | 90            | <b>6525929</b>    |
| Other crops         | 105511          | 539367          | 1464713        | 1202979        | 35224             | 1893          | 6491                | 659           | <b>3356835</b>    |
| Forest plantation   | 1860            | 1098            | 1359           | 1694           | 70848             | 2             | 29                  | 0             | <b>76890</b>      |
| Urban area          | 41              | 58              | 23             | 39             | 0                 | 95030         | 14                  | 23            | <b>95229</b>      |
| Non-vegetated areas | 6418            | 10441           | 6993           | 8920           | 592               | 744           | 100378              | 1350          | <b>135835</b>     |
| Water               | 115221          | 1373            | 18             | 546            | 12                | 23            | 1276                | 436369        | <b>554839</b>     |
| <b>TOTAL 2017</b>   | <b>37467351</b> | <b>18745326</b> | <b>9491541</b> | <b>2959023</b> | <b>158790</b>     | <b>106159</b> | <b>143279</b>       | <b>509383</b> |                   |

## Notes on Supplementary Tables 1 and 2

Supplementary tables are matrices of change in land use/cover (LULC) between two points in time in hectares, with column and row totals. Areas of individual LULC classes for the initial point in time (e.g. in Supp. Table 1 this is 2004) are located in the vertical axis of the Table. Hence, the LULC area for each class for the initial time point is shown in the final column of the table. Correspondingly, areas of individual LULC classes for the second point in time are located in the horizontal axis, with the final row showing the total area for each class in the late point in time. The values in each cell in the Table indicate the amount of land moving from one class to another. For example, Supplementary. Table 1 shows 281,553 ha changed from Natural Forest in 2004 to Soybean in 2011 and 1,599,995 ha from Pasture to Soybean.

## Supplementary Table 3. Spatial regression model results.

| Independent variables                             | Model coefficients      |
|---------------------------------------------------|-------------------------|
|                                                   | Deforestation 2004—2017 |
| Constant                                          | 9436.54                 |
| Proportion not destined for international markets | 172.762*                |
| Soybean trade instability                         | 57.0596                 |
| Soybean production ( $\Delta t14$ )               | 0.0298*                 |
| Pastureland 2004                                  | 0.0554***               |
| Agricultural job                                  | -0.953                  |
| Cattle density                                    | -23186.7***             |
| Slope                                             | -985.3*                 |
| W (lag model)                                     | 0.3247**                |
| R-squared                                         | 0.4495                  |

\* indicates significance at the 95% confidence level, \*\* =99%, and \*\*\* = 99.9%. n = 128. W is the spatial lag term of the dependent variable (its coefficient parameter, rho, reflects the spatial dependence inherent in the data).

**Supplementary Table 4. Correlations.**

| <b>Correlation test</b>                                                                  | <b>Coefficient</b> | <b>p-value</b>       |
|------------------------------------------------------------------------------------------|--------------------|----------------------|
| Proportion not destined for international markets vs soybean trade instability           | -0.4998            | p < 0.001 (Spearman) |
| Proportion not destined for international markets vs cattle herd change (2004—2017)      | 0.2529             | p < 0.05 (Pearson)   |
| Proportion not destined for international markets vs mean cattle density (2004—2017)     | 0.2535             | p < 0.01 (Spearman)  |
| Proportion not destined for international markets vs pastureland area change (2004—2017) | 0.2625             | p < 0.01 (Spearman)  |
| Proportion not destined for international markets vs mean farm size                      | -0.4066            | p < 0.001 (Spearman) |
| soybean trade instability vs mean farm size                                              | 0.2106             | p < 0.05 (Spearman)  |

**Supplementary Table 5. TRASE model—Spatial regression model results.**

| <b>Independent variables</b>                      | <b>Model coefficients</b>      |
|---------------------------------------------------|--------------------------------|
|                                                   | <b>Deforestation 2004—2017</b> |
| Constant                                          | 26373.3**                      |
| Proportion not destined for international markets | 22.2061                        |
| Soybean trade instability                         | 17.5562                        |
| Soybean production ( $\Delta t14$ )               | 0.0294**                       |
| Pastureland 2004                                  | 0.0529***                      |
| Agricultural job                                  | -2.9583                        |
| Cattle density                                    | -24167.1***                    |
| Slope                                             | -1211.14*                      |
| W (lag model)                                     | 0.1712                         |
| R-squared                                         | 0.4313                         |

\* indicates significance at the 95% confidence level, \*\* =99%, and \*\*\* = 99.9%. n = 112. W is the spatial lag term of the dependent variable (its coefficient parameter, rho, reflects the spatial dependence inherent in the data).

**Supplementary Table 6. Data Sources.**

| <b>Datasets</b>        | <b>Geographical scale</b> | <b>Source</b>                                                                                                                 |   |
|------------------------|---------------------------|-------------------------------------------------------------------------------------------------------------------------------|---|
| Crop production        | Municipality              | IBGE/PAM (table 1612)<br><a href="https://sidra.ibge.gov.br/tabela/1612">https://sidra.ibge.gov.br/tabela/1612</a>            | - |
| Soybean trade/exports  | Municipality              | TRASE/Soy - <a href="https://trase.earth/explore">https://trase.earth/explore</a>                                             |   |
| LULC                   | Municipality              | MapBiomas - <a href="https://mapbiomas.org/download">https://mapbiomas.org/download</a>                                       |   |
| Cattle herd            | Municipality              | IBGE/PPM (table 3939)<br><a href="https://sidra.ibge.gov.br/tabela/3939">https://sidra.ibge.gov.br/tabela/3939</a>            | - |
| Gross domestic product | Municipality              | IBGE/PIBM (table 5938)<br><a href="https://sidra.ibge.gov.br/tabela/5938">https://sidra.ibge.gov.br/tabela/5938</a>           | - |
| Formal jobs            | Municipality              | IBGE/CNAE 2.0 (table 6449)<br><a href="https://sidra.ibge.gov.br/Tabela/6449">https://sidra.ibge.gov.br/Tabela/6449</a>       | - |
| Soybean farm size      | Municipality              | Silva et al. 2020 - <a href="https://doi.org/10.3390/land9110422">https://doi.org/10.3390/land9110422</a>                     |   |
| Slope (topography)     | Brazil (pixel level)      | Valeriano 2008<br><a href="http://www.dsr.inpe.br/topodata/documentos.php">http://www.dsr.inpe.br/topodata/documentos.php</a> | - |
| Transportation Cost    | Brazil (pixel level)      | Victoria et al. 2021<br><a href="https://doi.org/10.1016/j.dib.2021.107070">https://doi.org/10.1016/j.dib.2021.107070</a>     | - |

**Supplementary Table 7. Reclassified Classes**

| <b>MapBiomias v7.0</b>    |           | <b>Reclassification</b> |           |
|---------------------------|-----------|-------------------------|-----------|
| <b>Class</b>              | <b>ID</b> | <b>New class</b>        | <b>ID</b> |
| Forest Formation          | 3         | Natural Forest          | 1         |
| Savanna Formation         | 4         |                         |           |
| Wetland                   | 11        |                         |           |
| Grassland                 | 12        |                         |           |
| Pasture                   | 15        | Pasture                 | 2         |
| Soybean                   | 39        | Soybean                 | 3         |
| Sugar cane                | 20        | Other Crops             | 4         |
| Mosaic of Uses            | 21        |                         |           |
| Cotton                    | 62        |                         |           |
| Other Temporary Crops     | 41        |                         |           |
| Forest Plantation         | 9         | Forest Plantation       | 5         |
| Urban Area                | 24        | Urban Area              | 6         |
| Mining                    | 30        | Non-Vegetated Areas     | 7         |
| Other non Vegetated Areas | 25        |                         |           |
| Rocky Outcrop             | 29        |                         |           |
| River, Lake and Ocean     | 33        | Water                   | 8         |

2 Supplementary Figures

Mato Grosso state, Brazil

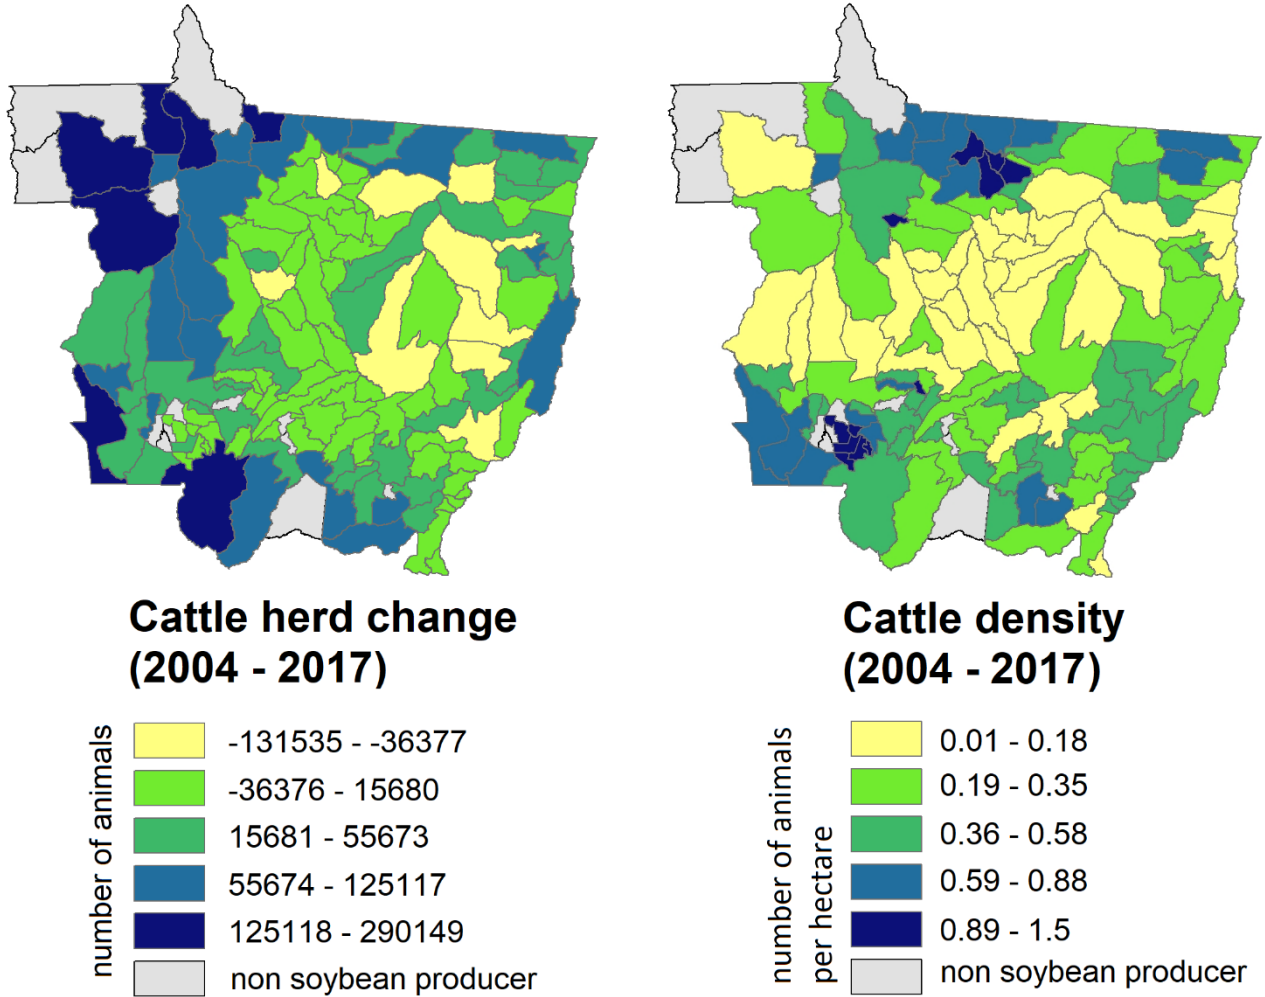

**Supplementary Figure 1.** Geographic distribution of cattle statistics (change in the cattle herd between 2004 and 2018, and mean cattle density for the 2004—2018 period) per each soybean producing municipality of Mato Grosso state, Brazil.

Mato Grosso state, Brazil

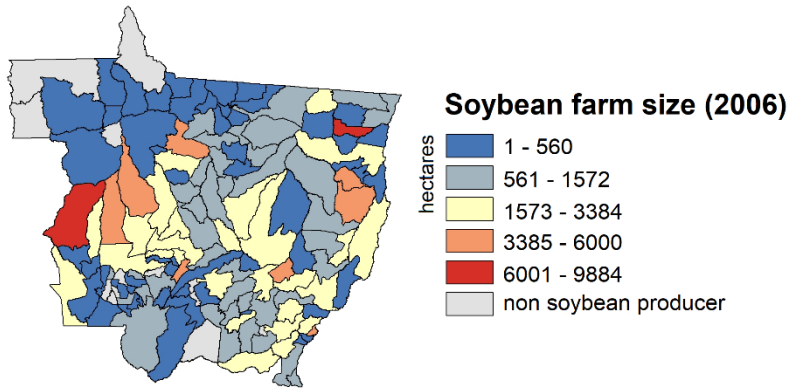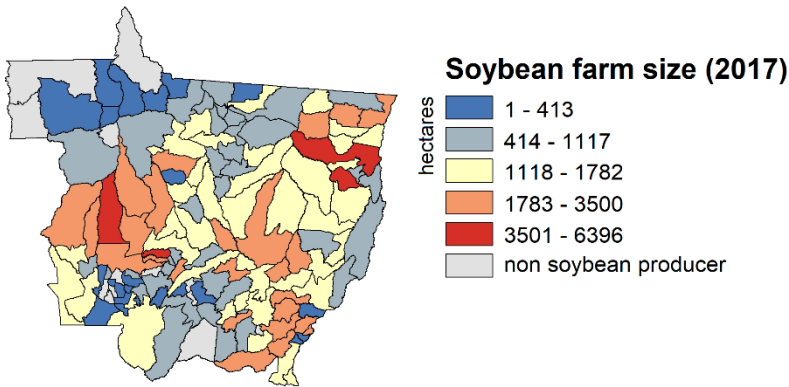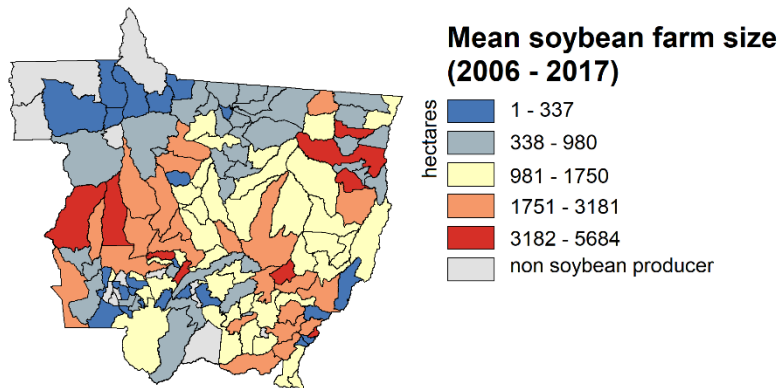

**Supplementary Figure 2.** Soybean farm size in municipalities of Mato Grosso state, Brazil. Mean farm size was calculated as the average of the soybean farm size for the years of 2006 and 2017 (data from Silva et al., 2020 and derived from the IBGE agricultural Censuses of 2006 and 2017).
